# Supplementary material for: Immune genes are hotspots of shared positive selection across birds and mammals
Source: eLife journal article supplement (doi:10.7554/elife.41815), 2019-01-08
Supplement: supp [file elife-41815-supp-v1.zip]

Archive with 9 entries (9 files):
- elife_poa_e41815_Figure_4_figure_supplement_3.pdf
- elife_poa_e41815_Figure_3_figure_supplement_1.pdf
- elife_poa_e41815_Figure_5_figure_supplement_1.pdf
- elife_poa_e41815_Figure_6_figure_supplement_1.pdf
- elife_poa_e41815_Supplementary_File_1.zip
- elife_poa_e41815_Figure_4_figure_supplement_1.pdf
- elife_poa_e41815_Figure_4_figure_supplement_4.pdf
- elife_poa_e41815_Figure_4_figure_supplement_2.pdf
- elife_poa_e41815_Transparent_Reporting_File.docx
