# Supplementary material for: Immune genes are hotspots of shared positive selection across birds and mammals
Source: eLife journal article supplement (doi:10.7554/elife.41815), 2019-01-08
Supplement: supp [file Supp_Table_11_transcriptome_dataset_info.xlsx]

## Sheet: Sheet1
clade	specific pathogen	general pathogen type	broad pathogen type	bioproject	species infected	reference genome	reference genome version	n samples	tissues	sample design	n conditions for sig.	publication
birds	E. coli	E. coli	bacterium	PRJNA279487	Gallus gallus	Gallus gallus	Gallus_gallus-5.0	24	bone marrow	infected (2 time points, resistant and susceptible strains at each timepoint) vs. control	2	Sun et al. 2015a
birds	E. coli	E. coli	bacterium	PRJNA284293	Gallus gallus	Gallus gallus	Gallus_gallus-5.0	24	thymus	infected (2 time points, resistant and susceptible strains at each timepoint) vs. control	2	Sun et al. 2016
birds	E. coli	E. coli	bacterium	PRJNA288323	Gallus gallus	Gallus gallus	Gallus_gallus-5.0	22	bursa of fabricius	infected (2 time points, resistant and susceptible strains at each timepoint) vs. control	1	Sun et al. 2015b
birds	Infectious Bursal Disease Virus	birnaviridae	virus	PRJEB7219	Gallus gallus	Gallus gallus	Gallus_gallus-5.0	6	spleen	infected vs. control	1	Smith, Burt and Bencina 2015
birds	influenza A	influenza	virus	PRJEB7213	Gallus gallus	Gallus gallus	Gallus_gallus-5.0	36	lung, ileum	infected (2 time points, 2 different viral strains, 2 different tissues) vs. control	1	Smith, Smith et al. 2015
birds	influenza A	influenza	virus	PRJEB7215	Anas platyrhynchos	Anas platyrhynchos	Anas_platyrhynchos.BGI_duck_1.0	36	lung, ileum	infected (2 time points, 2 different viral strains, 2 different tissues) vs. control	2	Smith, Smith et al. 2015
birds	Mycoplasma gallisepticum Strain Rlow	mycoplasma	bacterium	PRJNA394119	Gallus gallus	Gallus gallus	Gallus_gallus-5.0	39	trachea	infected (4 time points) vs. control	2	Beaudet et al. 2017
birds	Newcastle Disease Virus	paramyxovirus	virus	PRJEB19318	Gallus gallus	Gallus gallus	Gallus_gallus-5.0	48	trachea	infected (3 time points, resistant and susceptible strains at each timepoint) vs. control	3	Deist, Gallardo, Bunn, Kelly et al. 2017
birds	Newcastle Disease Virus	paramyxovirus	virus	PRJEB21688	Gallus gallus	Gallus gallus	Gallus_gallus-5.0	31	spleen	infected (2 time points, resistant and susceptible strains at each timepoint) vs. control	2	Zhang et al. 2018
birds	Newcastle Disease Virus	paramyxovirus	virus	PRJEB21760	Gallus gallus	Gallus gallus	Gallus_gallus-5.0	48	lung	infected (3 time points, resistant and susceptible strains at each timepoint) vs. control	3	Deist, Gallarado, Bunn, Dekkers et al. 2017
birds	Plasmodium ashfordi	plasmodium	plasmodium	PRJNA257687	Spinus spinus	Serinus canaria	GCF_000534875.1_SCA1	12	whole blood	infected (2 time points) vs. control	1	Videvall et al. 2015
birds	West Nile Virus	west_nile_virus	virus	PRJNA352507	Taeniopygia guttata	Taeniopygia guttata	taeGut3.2.4	9	spleen	infected (2 time points) vs. control	1	Newhouse et al. 2017
mammals	E. coli	E. coli	bacterium	PRJNA254331	Macaca fascicularis	Macaca fascicularis	Macaca_fascicularis_5.0	18	lung	infected (three doses) vs. infected	2	Langley et al. 2014
mammals	E. coli	E. coli	bacterium	PRJNA285798	Homo sapiens	Homo sapiens	Homo_sapiens.GRCh38	72	whole blood	infected (3 treatments) vs control	2	DeBerg et al. 2016
mammals	E. coli	E. coli	bacterium	PRJNA395845	Homo sapiens	Homo sapiens	Homo_sapiens.GRCh38	35	neonatal monocyte	infected vs. control	1	Jong et al. 2018
mammals	influenza A	influenza	virus	PRJNA305099	Homo sapiens	Homo sapiens	Homo_sapiens.GRCh38	6	primary normal human bronchial epithelial cells	Infected (2 time points) vs. control	2	Lee et al. 2016
mammals	influenza A	influenza	virus	PRJNA382632	Homo sapiens	Homo sapiens	Homo_sapiens.GRCh38	64	human monocyte-derived macrophages	Infected (4 time points, 3 viral strains) vs. control	4	-
mammals	influenza A	influenza	virus	PRJNA385346	Mus musculus	Mus musculus	Mus_musculus.GRCm38	48	lung	infected (3 viral strains) vs. control	2	-
mammals	Mycoplasma agalactiae	mycoplasma	bacterium	PRJEB17676	Ovis aries	Ovis aries	Ovis_aries.Oar_v3.1	12	spleen, mammary gland	infected vs. control	1	Chopra-Dewasthaly et al. 2017
mammals	Mycoplasma agalactiae	mycoplasma	bacterium	PRJNA143425	Capra hircus	Capra hircus	Capra_hircus.ARS1	12	primary goat mammary epithelial cell	infected (3 time points) vs control	2	Ogorevc et al. 2015
mammals	Plasmodium berghei	plasmodium	plasmodium	PRJNA314450	Homo sapiens	Homo sapiens	Homo_sapiens.GRCh38	15	hepatocytes (Huh7.5.1)	Infected (2 time points) vs. control	2	-
mammals	Plasmodium chabaudi	plasmodium	plasmodium	PRJEB1284	Mus musculus	Mus musculus	Mus_musculus.GRCm38	24	spleen	infected (7 time points) vs control	4	-
mammals	Plasmodium chabaudi	plasmodium	plasmodium	PRJEB4731	Mus musculus	Mus musculus	Mus_musculus.GRCm38	100	spleen	infected (9 time points) vs control	5	-
mammals	Plasmodium falciparum	plasmodium	plasmodium	PRJNA227074	Homo sapiens	Homo sapiens	Homo_sapiens.GRCh38	192	whole blood	infected vs. control	1	Tran et al. 2016
mammals	Plasmodium vivax	plasmodium	plasmodium	PRJNA279199	Homo sapiens	Homo sapiens	Homo_sapiens.GRCh38	24	whole blood	infected vs. control	1	Rojas-Pena et al. 2015
mammals	West Nile Virus	west_nile_virus	virus	PRJNA174747	Homo sapiens	Homo sapiens	Homo_sapiens.GRCh38	20	macrophages	infected vs. control	1	Qian et al. 2013
