# Supplementary figures and images for: Immune genes are hotspots of shared positive selection across birds and mammals
Source: eLife journal article supplement (doi:10.7554/elife.41815), 2019-01-08

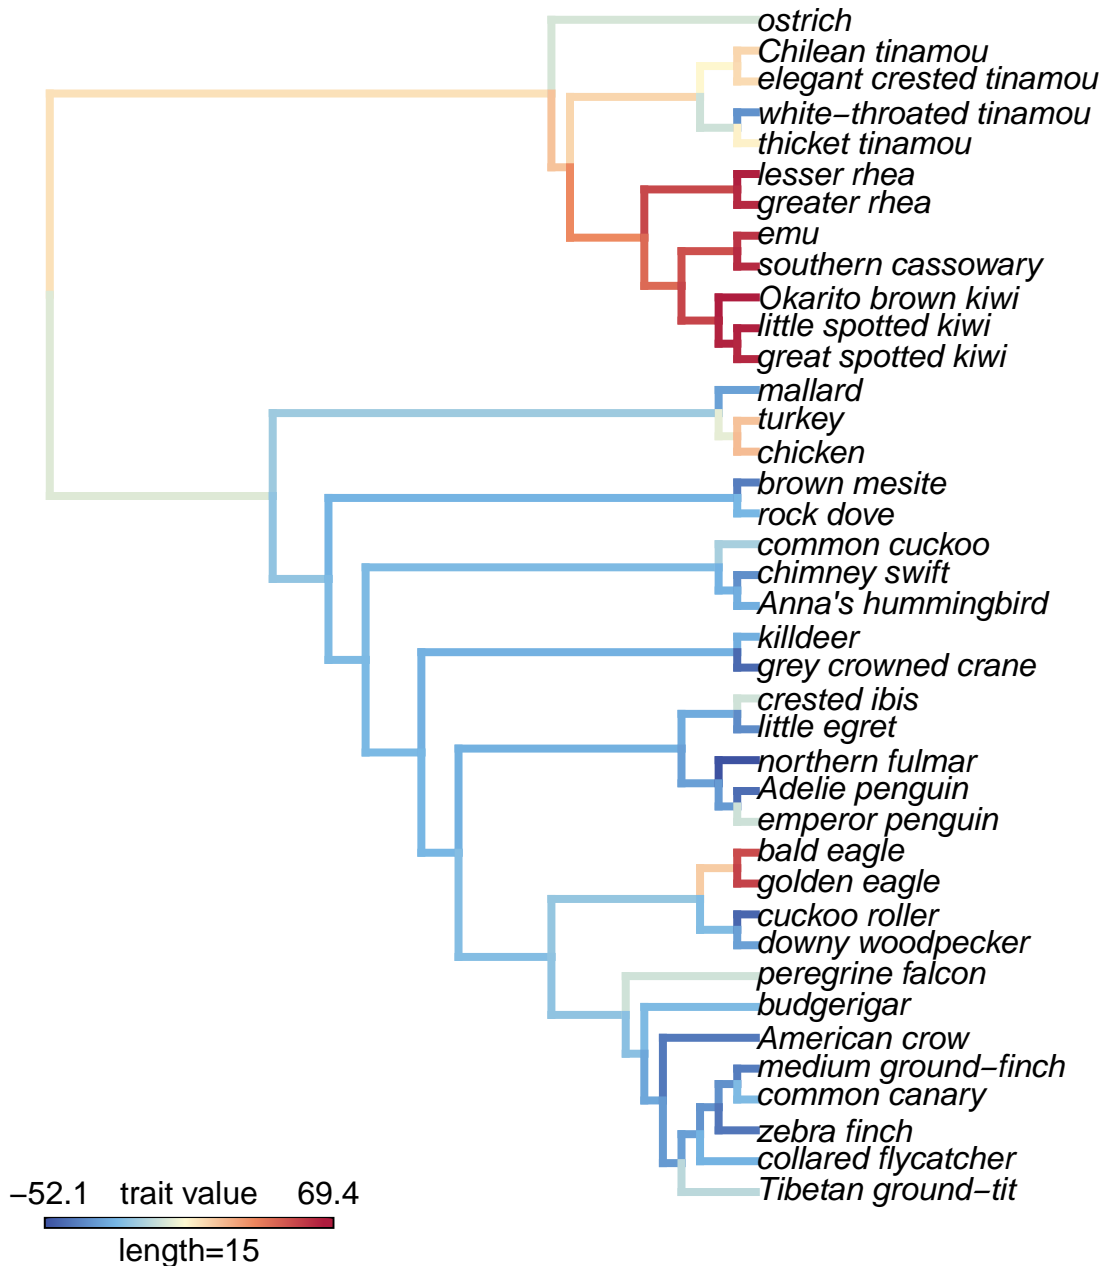

Supplement: supp [file elife-41815-supp-v1.zip › elife_poa_e41815_Figure_4_figure_supplement_3.pdf]

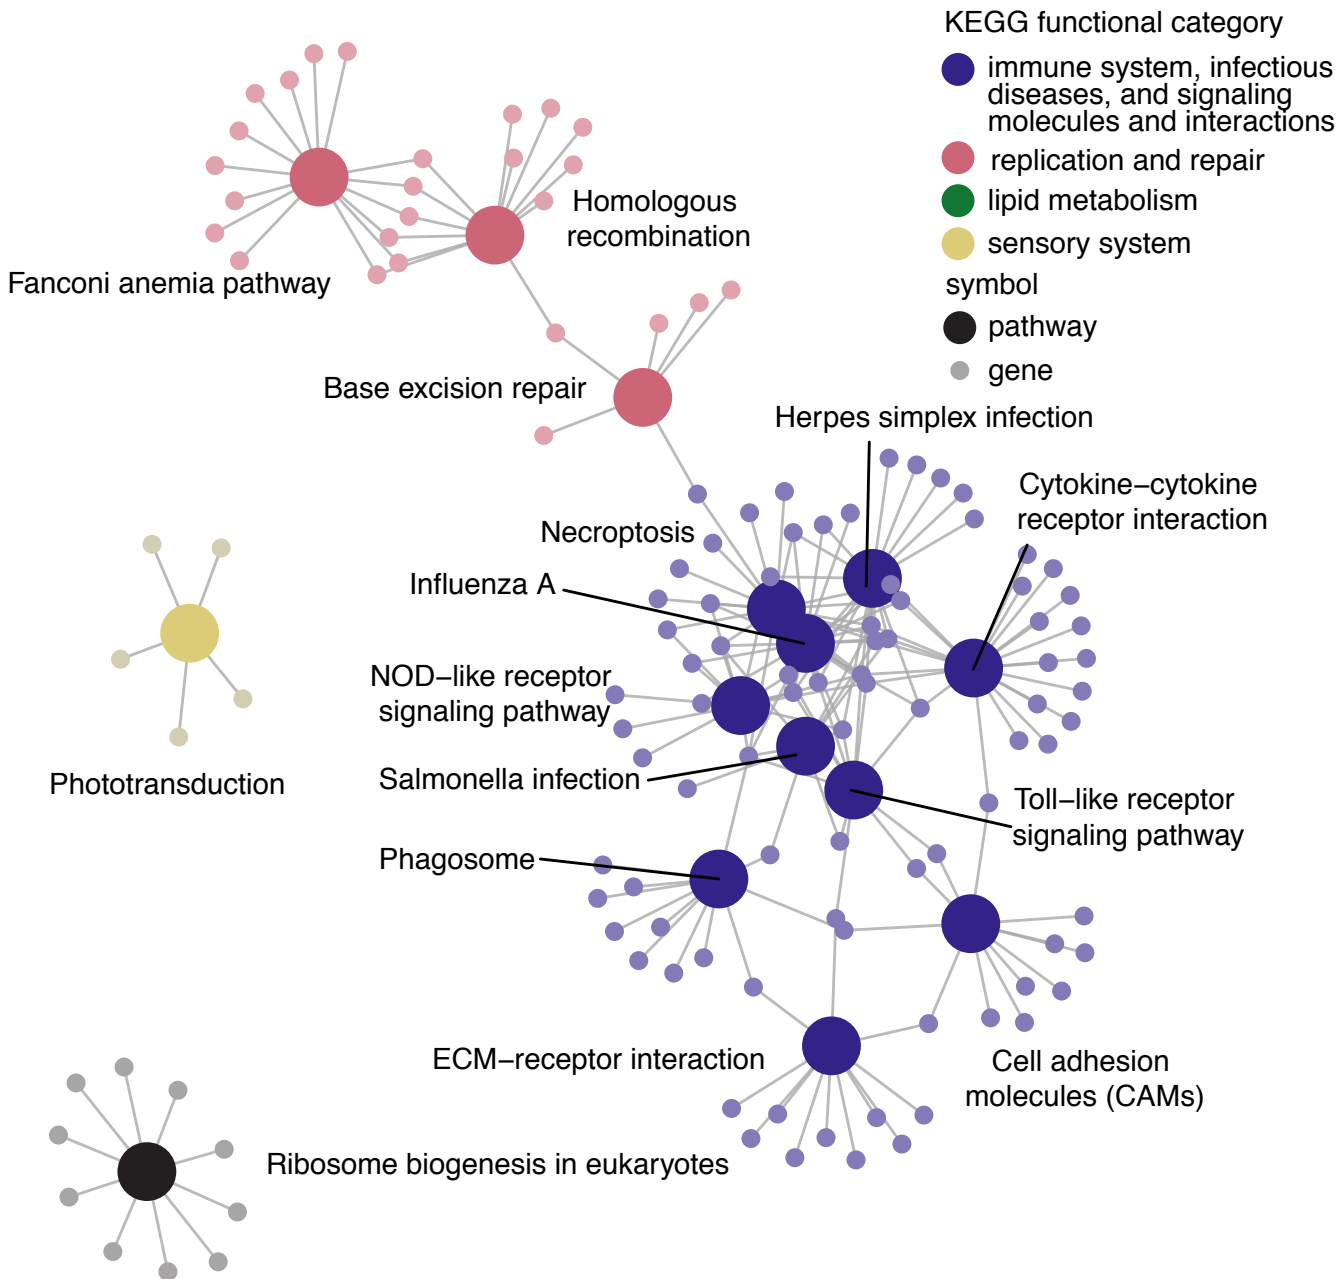

Supplement: supp [file elife-41815-supp-v1.zip › elife_poa_e41815_Figure_3_figure_supplement_1.pdf]

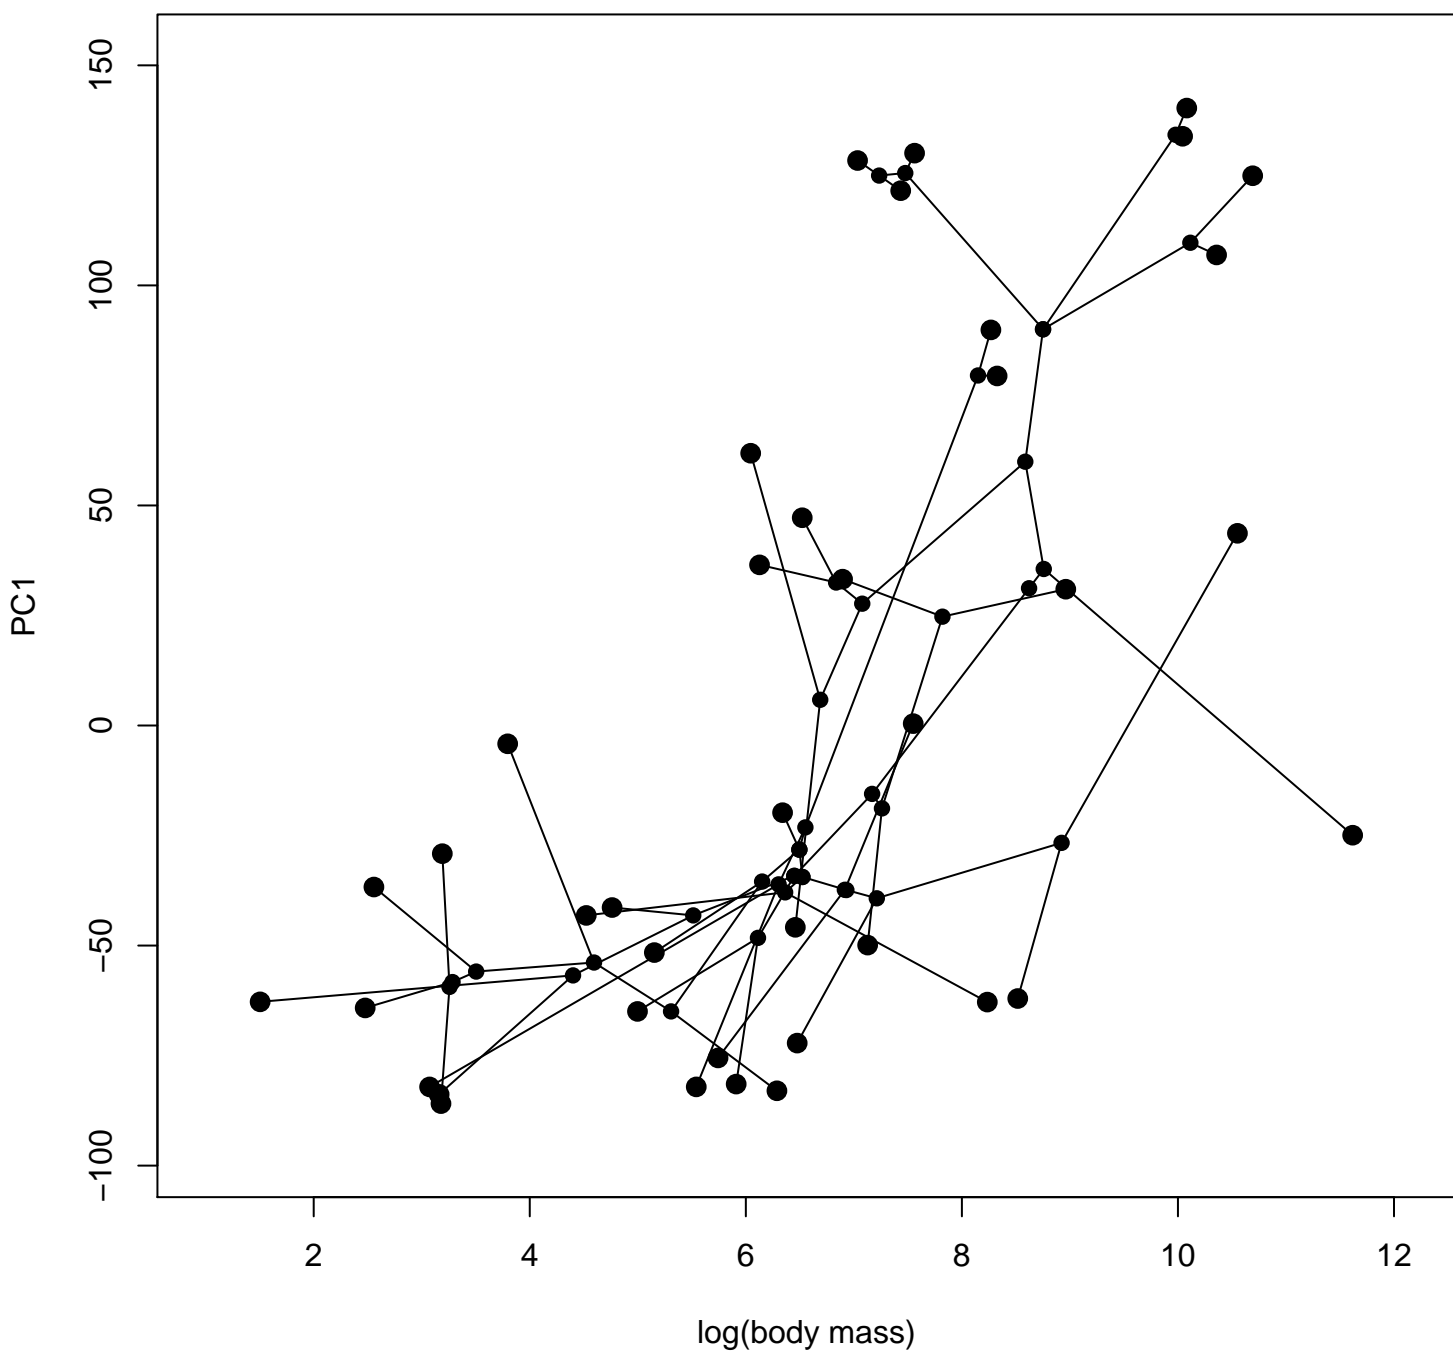

Supplement: supp [file elife-41815-supp-v1.zip › elife_poa_e41815_Figure_5_figure_supplement_1.pdf]

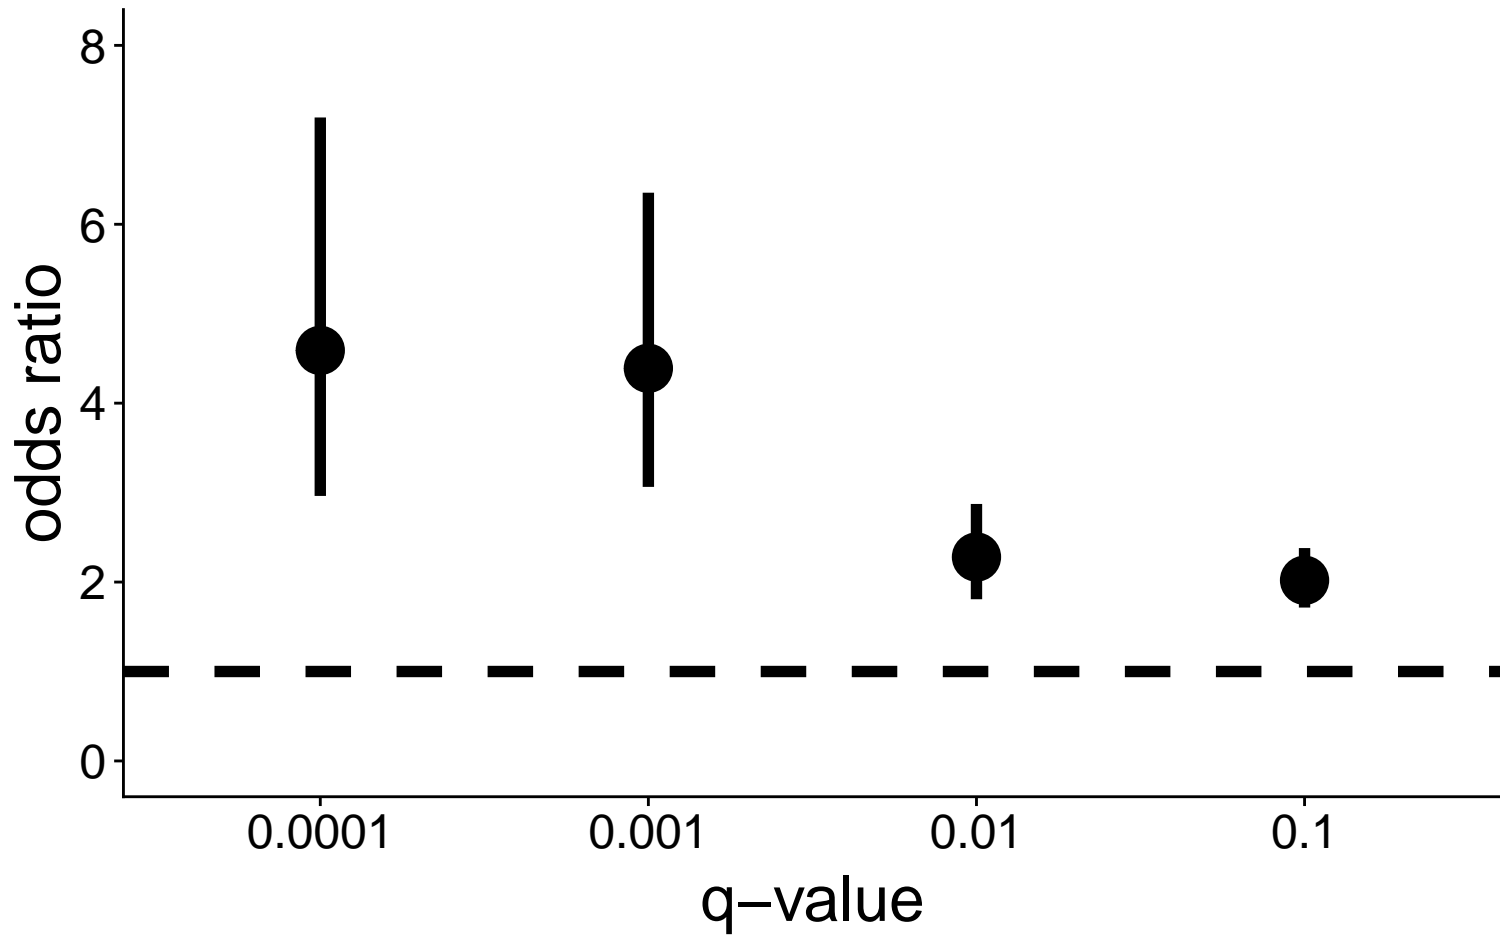

Supplement: supp [file elife-41815-supp-v1.zip › elife_poa_e41815_Figure_6_figure_supplement_1.pdf]

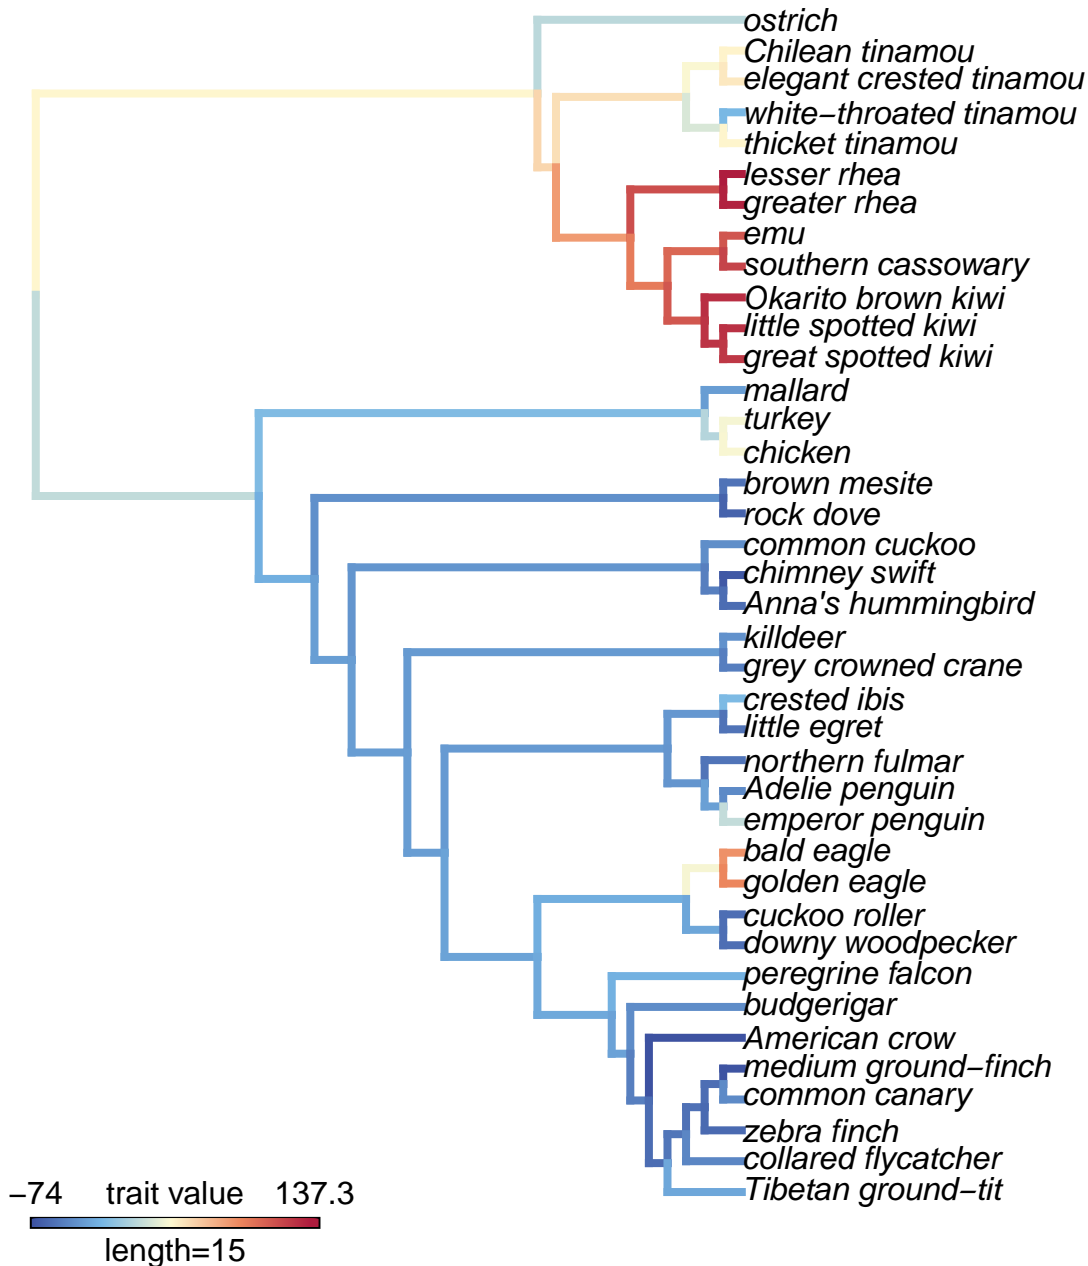

Supplement: supp [file elife-41815-supp-v1.zip › elife_poa_e41815_Figure_4_figure_supplement_1.pdf]

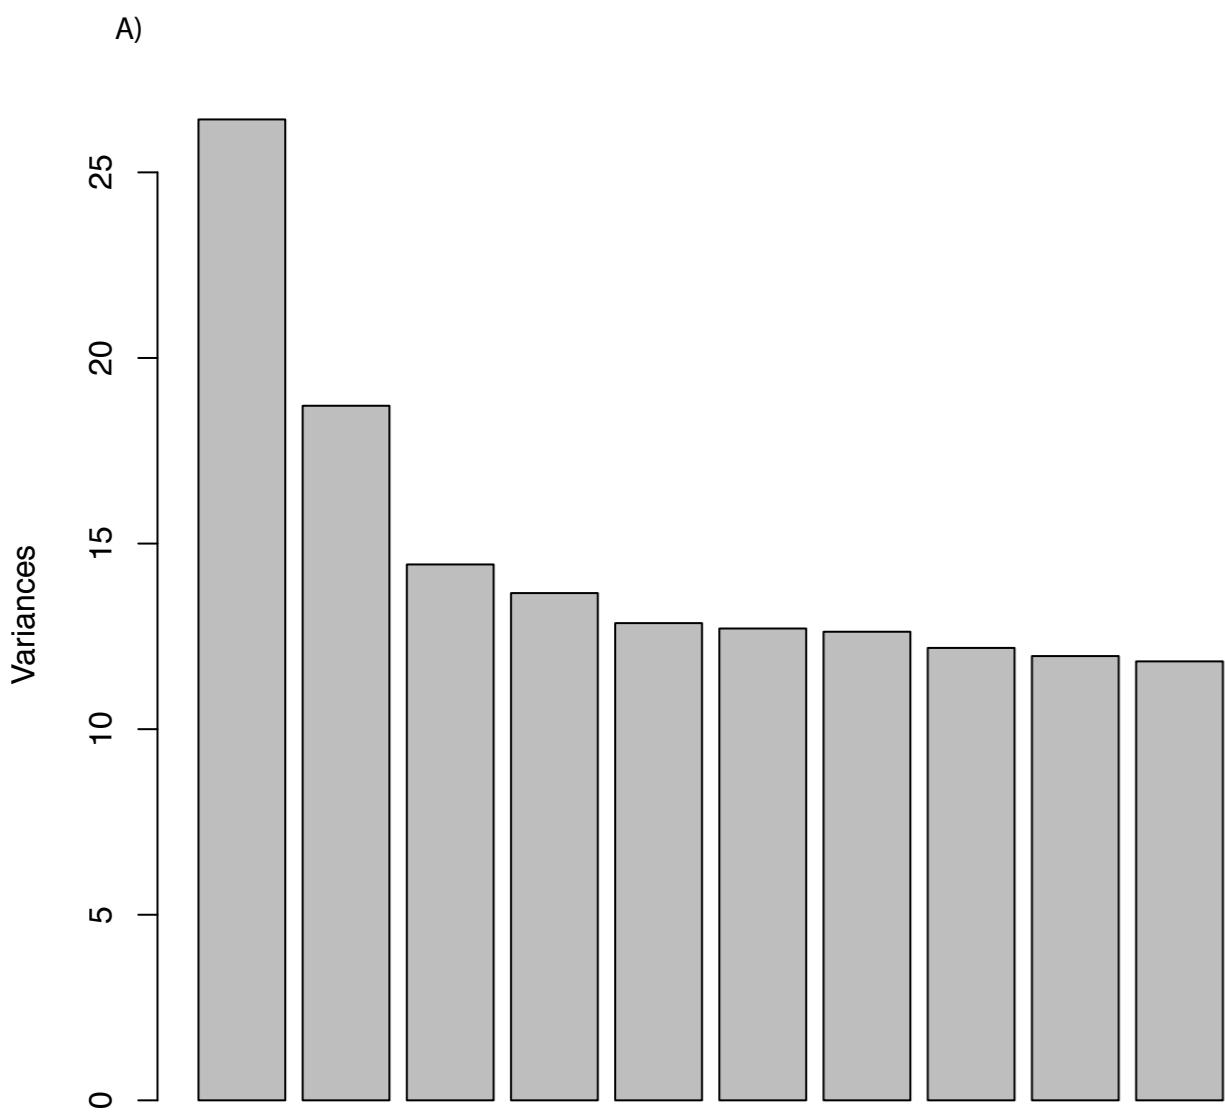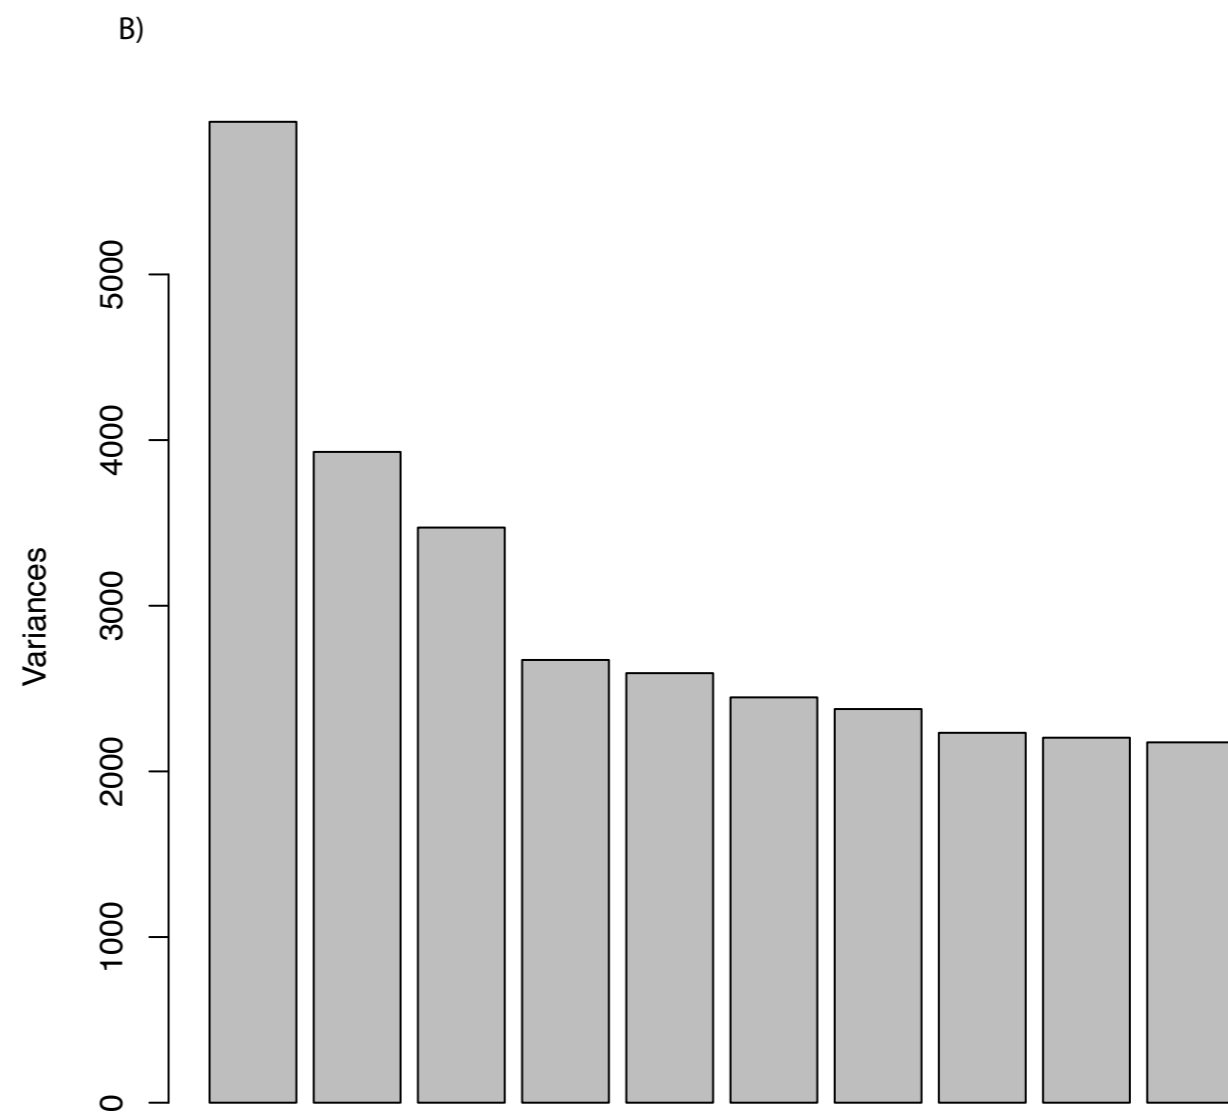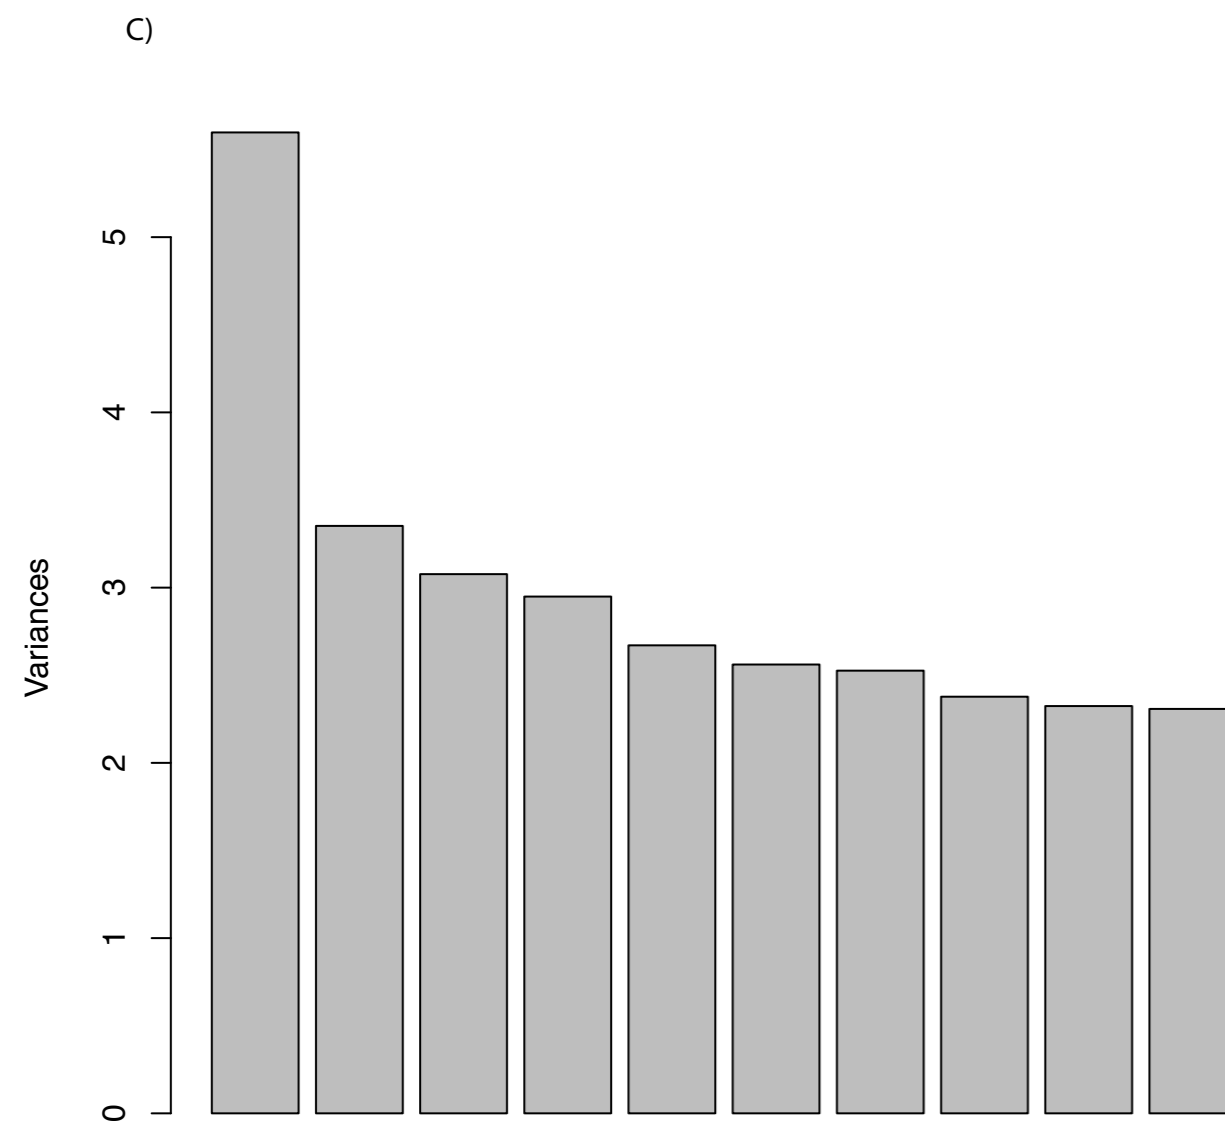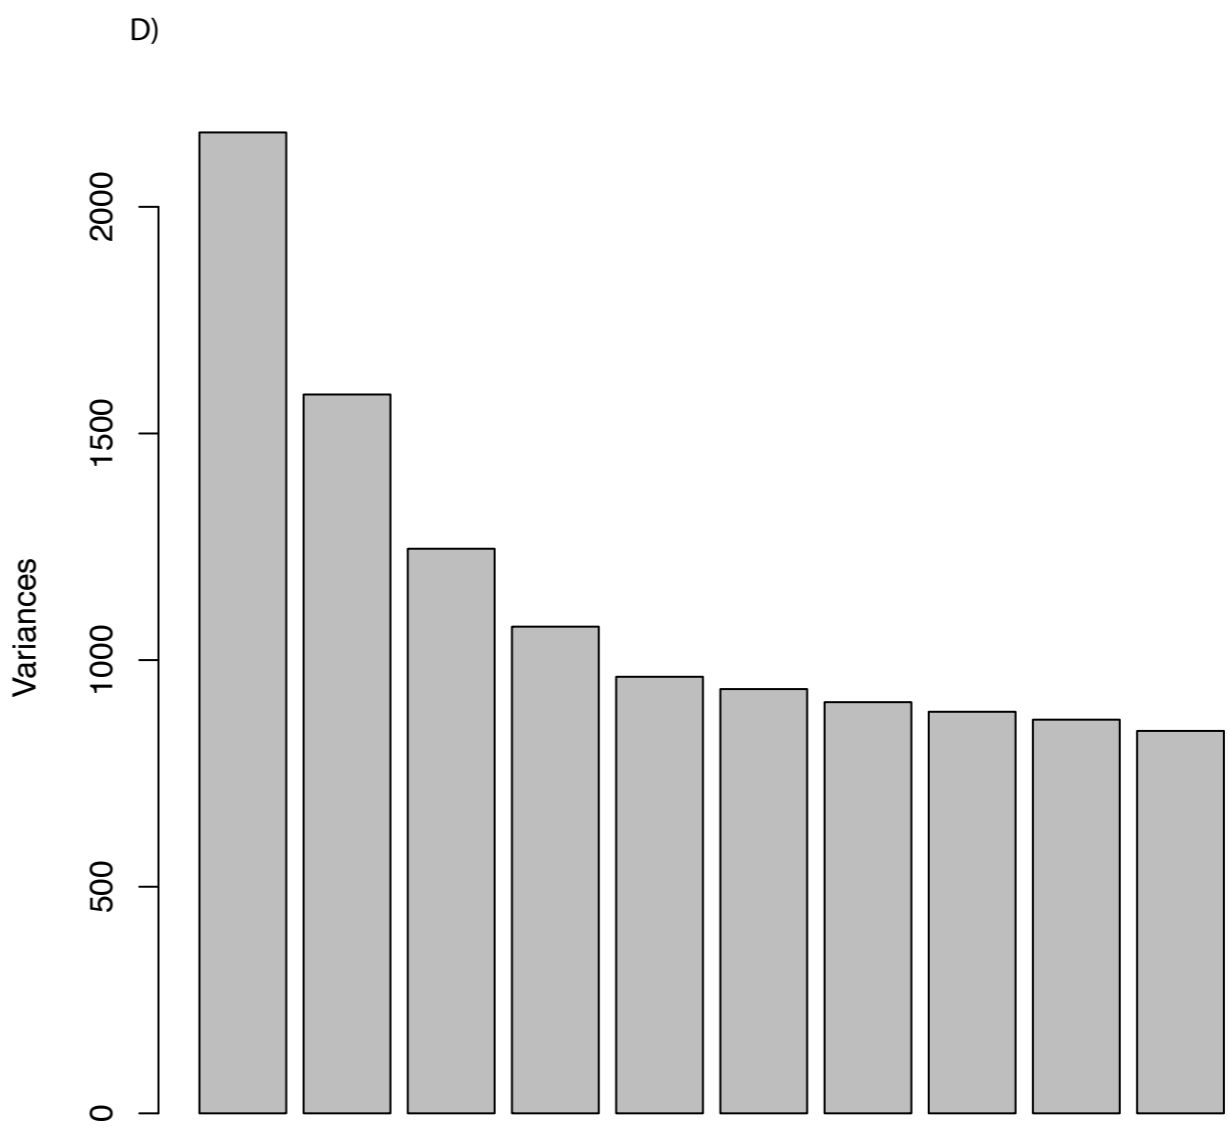

Supplement: supp [file elife-41815-supp-v1.zip › elife_poa_e41815_Figure_4_figure_supplement_4.pdf]

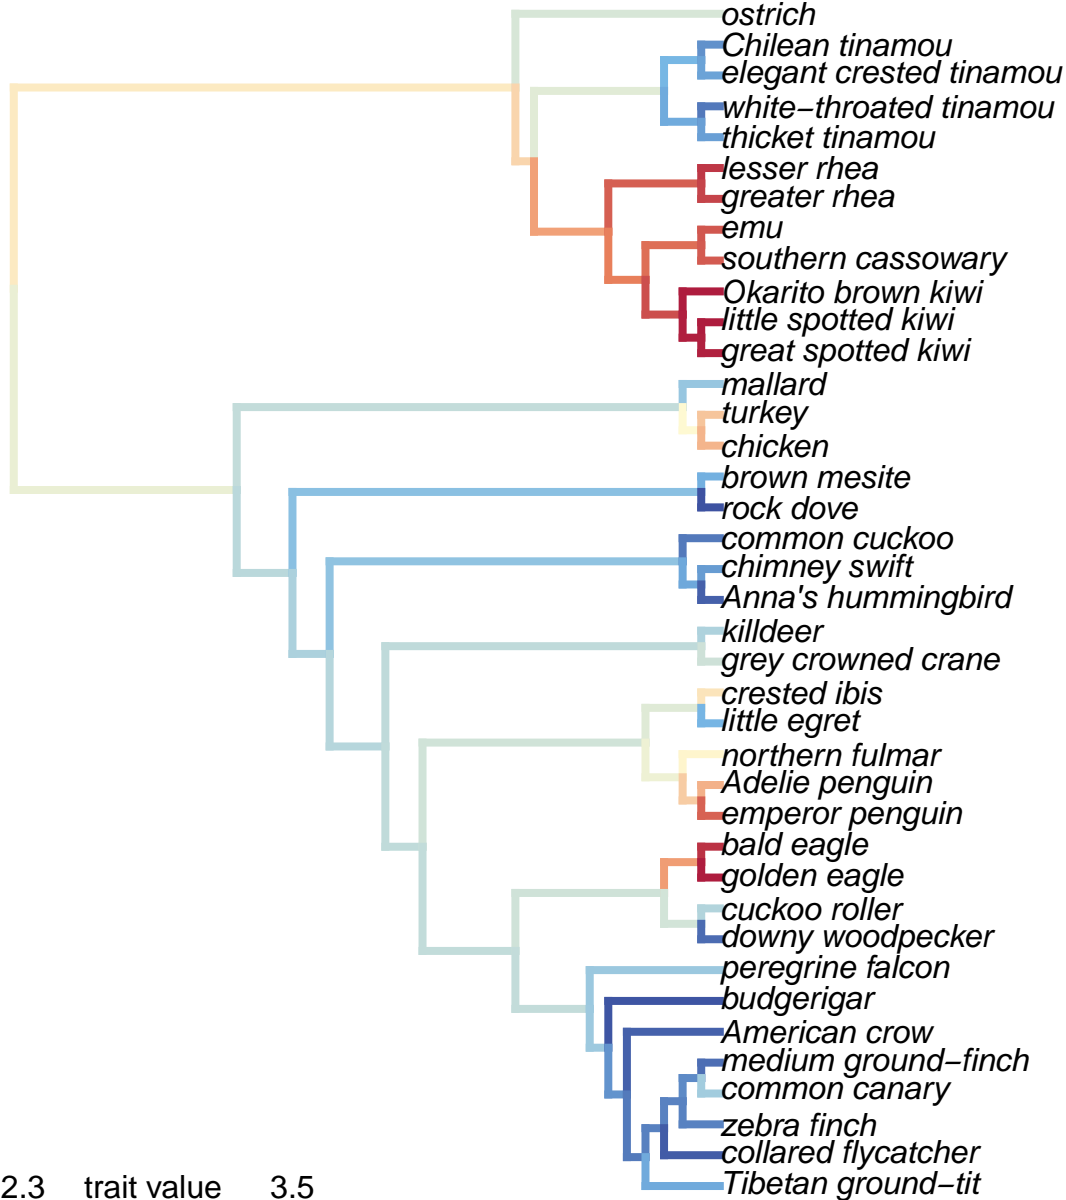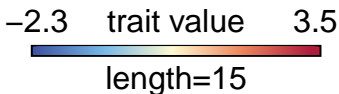

Supplement: supp [file elife-41815-supp-v1.zip › elife_poa_e41815_Figure_4_figure_supplement_2.pdf]
